# Supplementary material for: Synthesis of medicinally important quinazolines decorated with 1,4-disubstituted-1,2,3-triazoles using CuSO4·5H2O–Et3N catalytic system
Source: Royal Society of Chemistry journal article supplement (doi:10.1039/c4ra02123a), 2014-01-01
Supplement: c4ra02123a1.pdf [file c4ra02123a1.pdf]

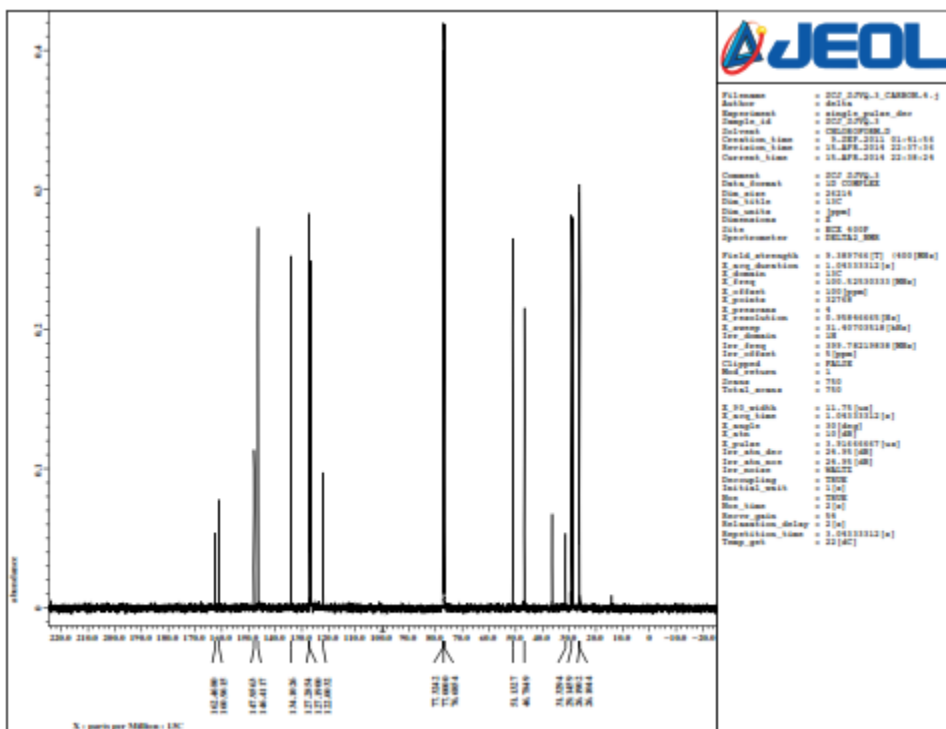

4-(4-(4-(1-Hydroxymethyl)-1*H*-1,2,3-triazol-1-yl)butyloxy)quinazoline (1b)

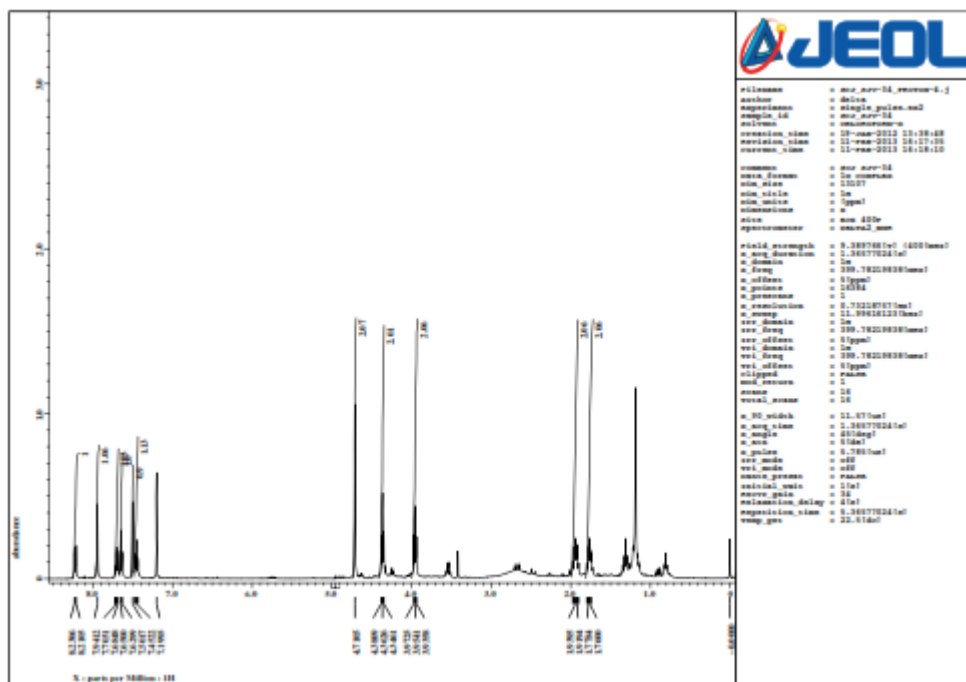



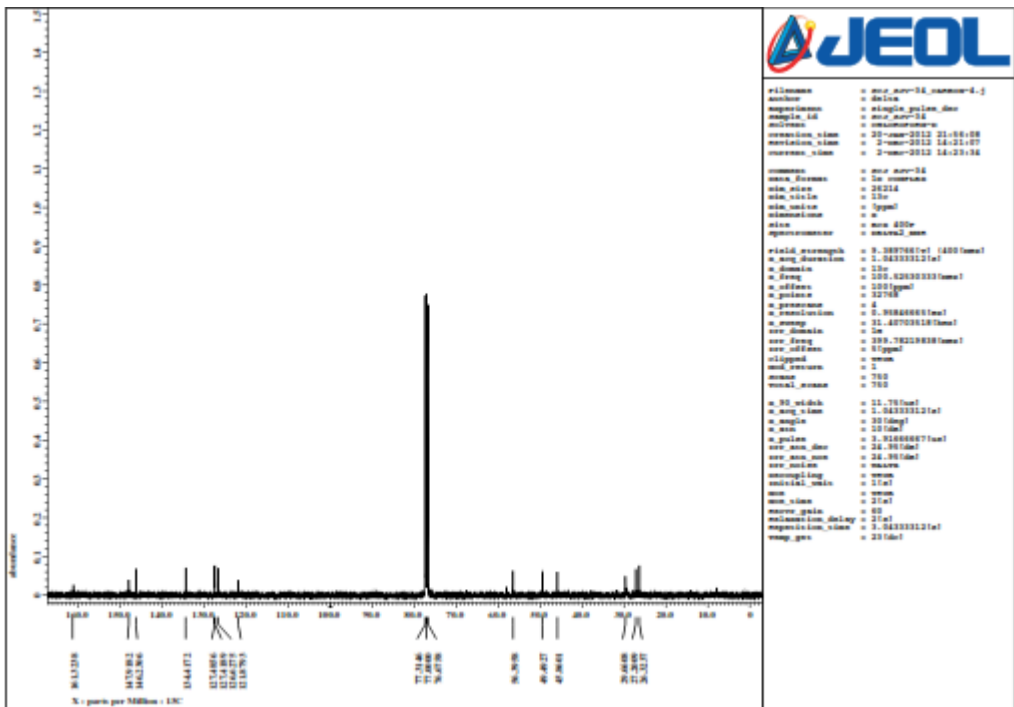

4-(4-(4-(1-Hydroxyethyl)-1*H*-1,2,3-triazol-1-yl) butyloxy)quinazoline (1c)

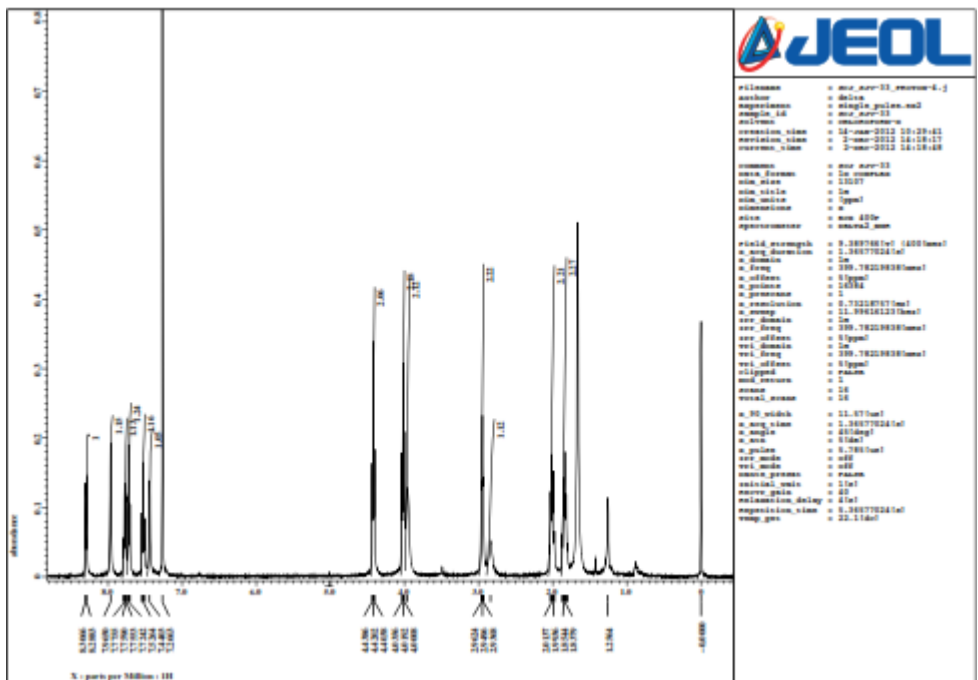

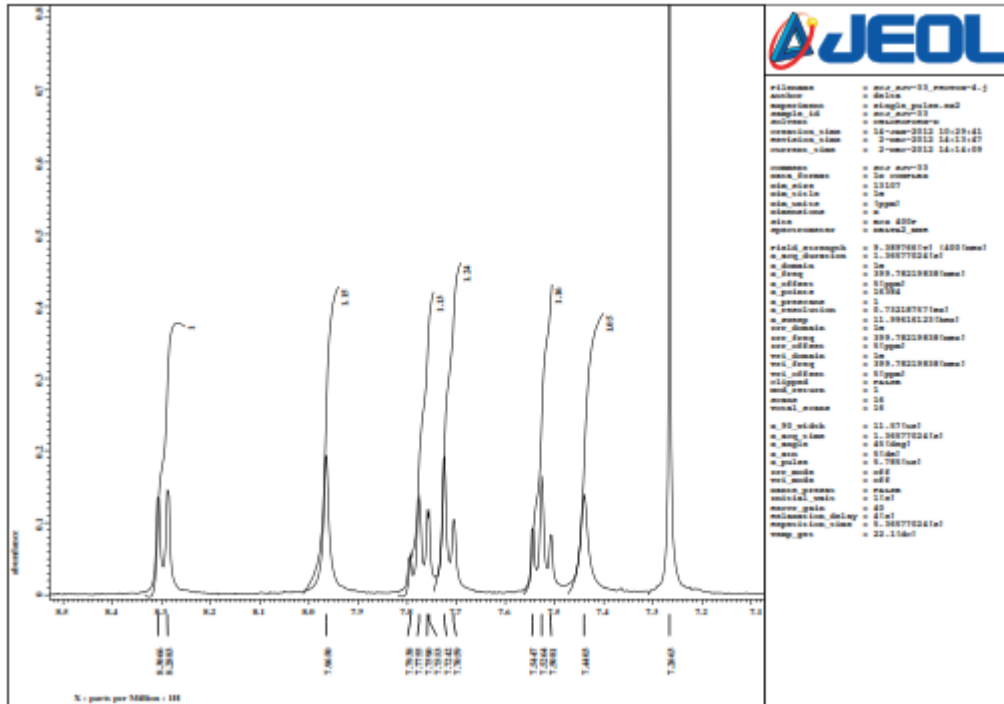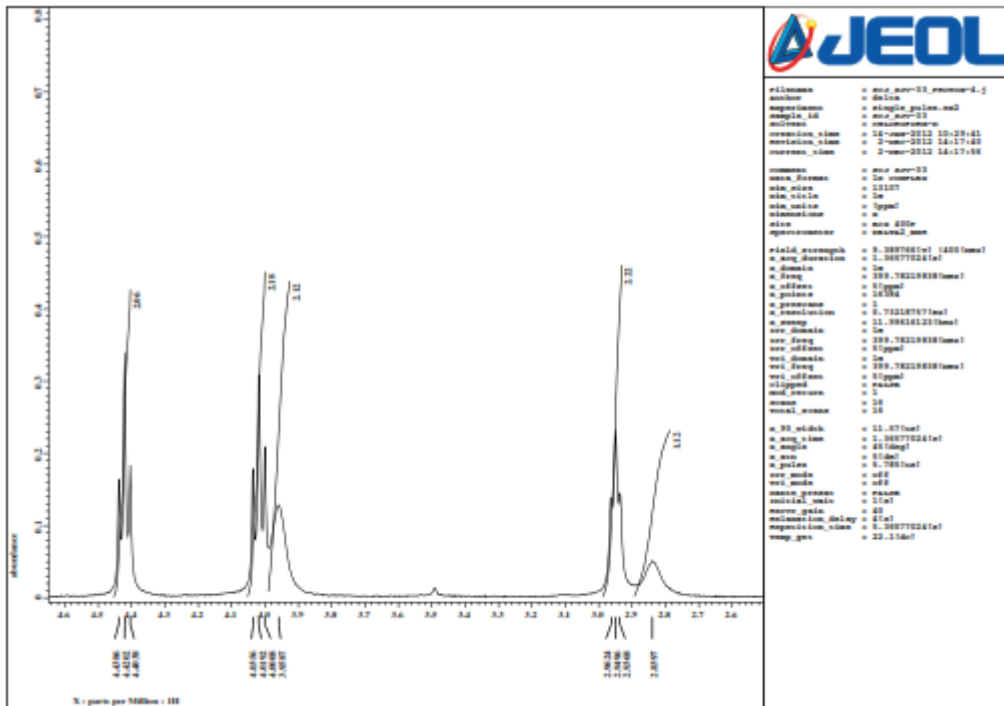





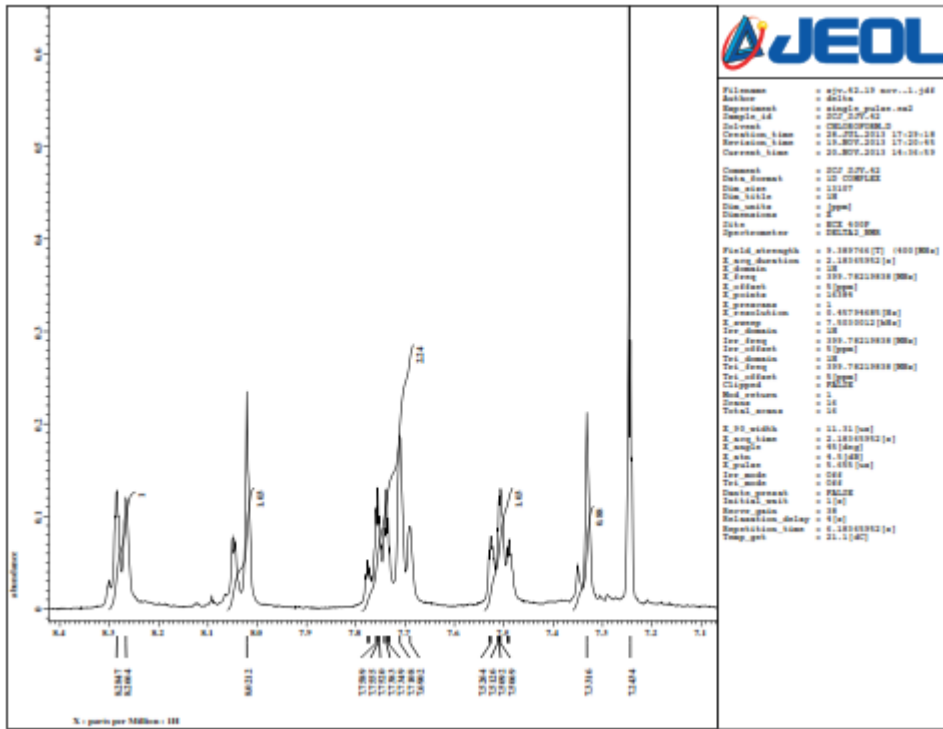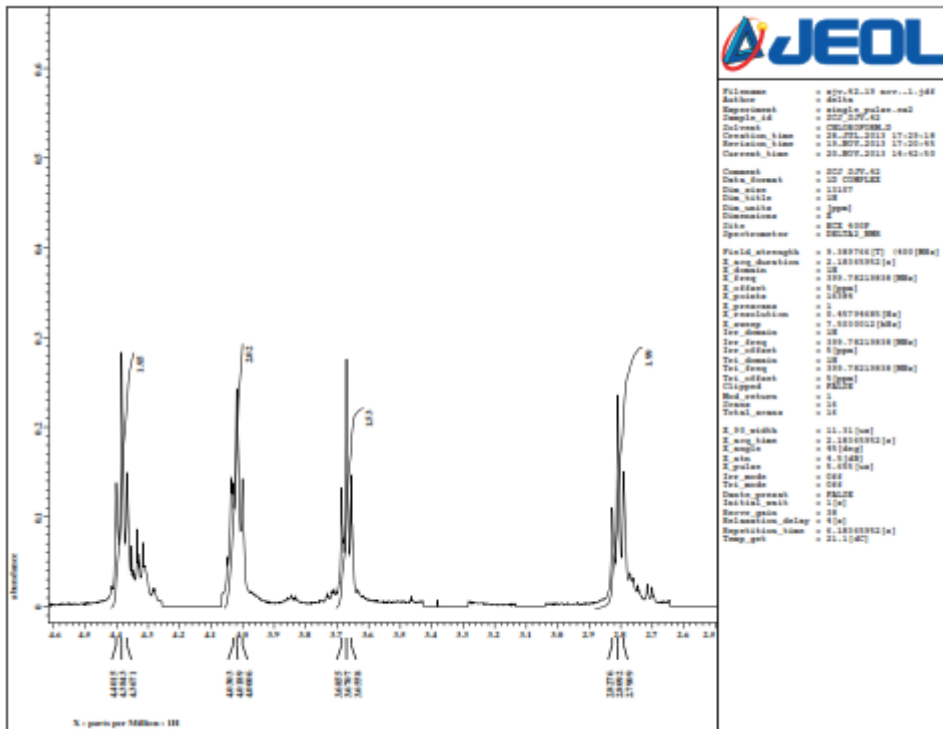

<sup>1</sup>H NMR (D<sub>2</sub>O exchangeable)









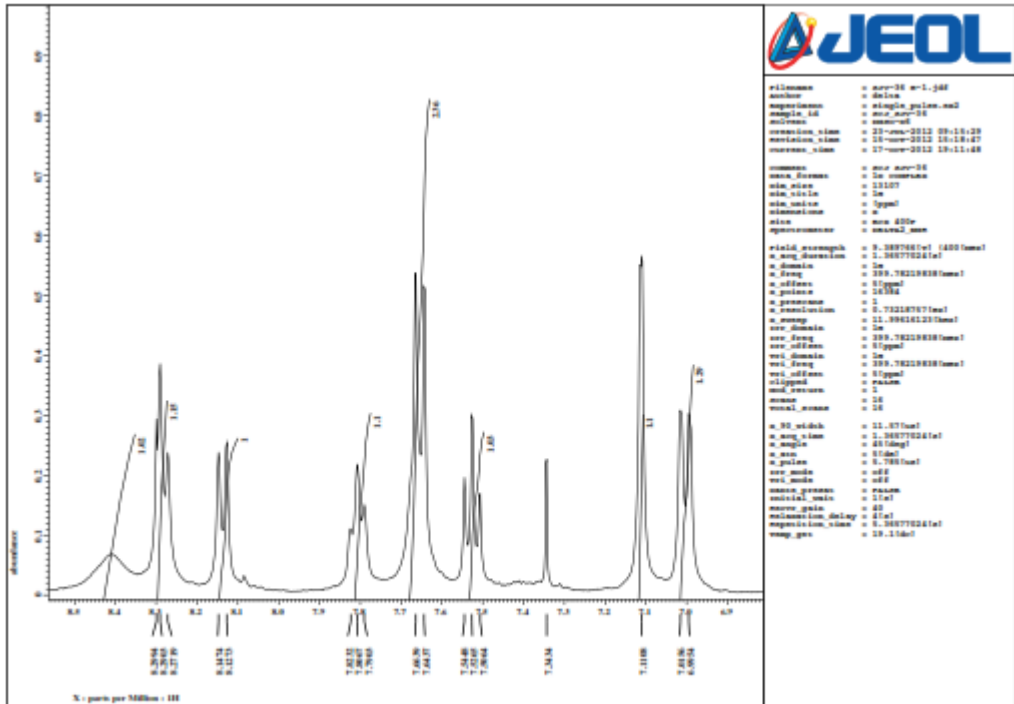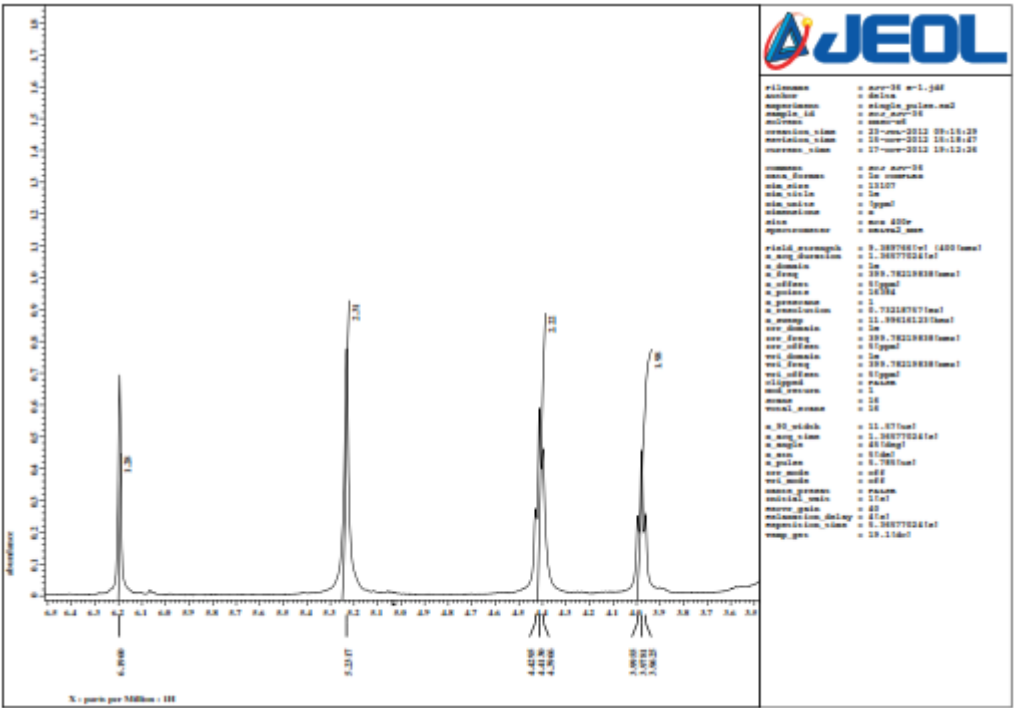

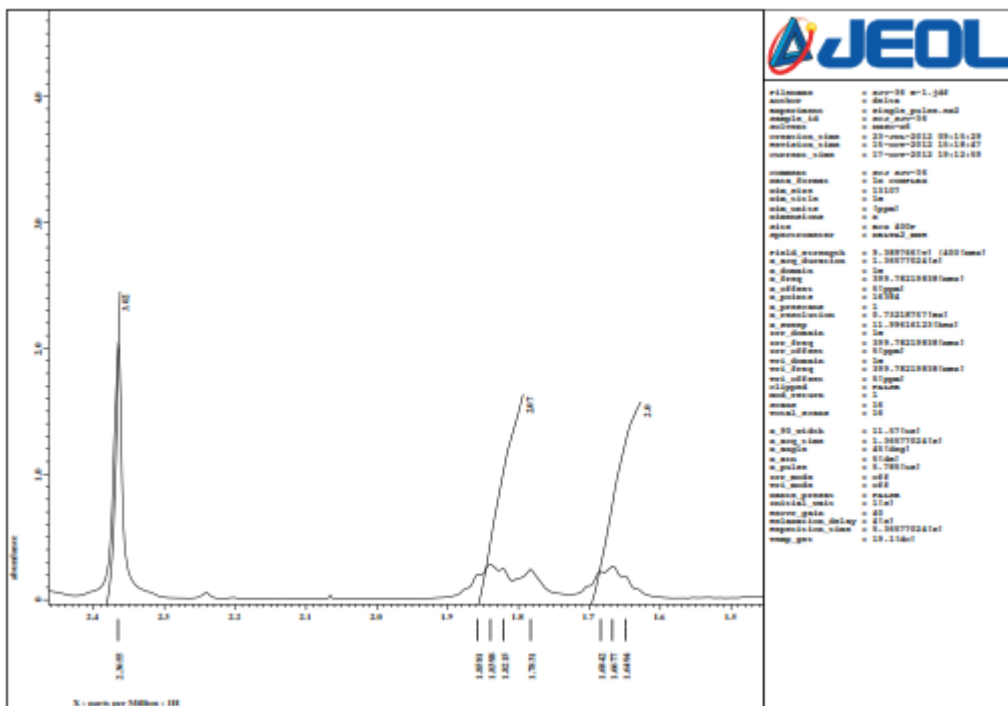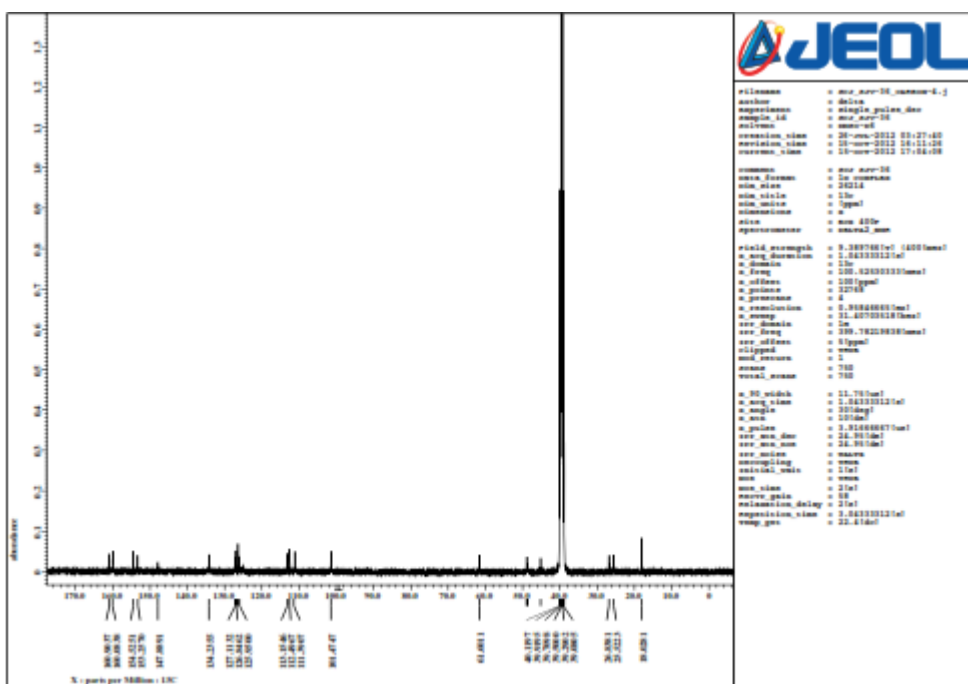

4-(4-(4-(Quinazolin-4-yl oxymethyl)-1H-1,2,3-triazol-1-yl)butyloxy)quinazoline (1g)







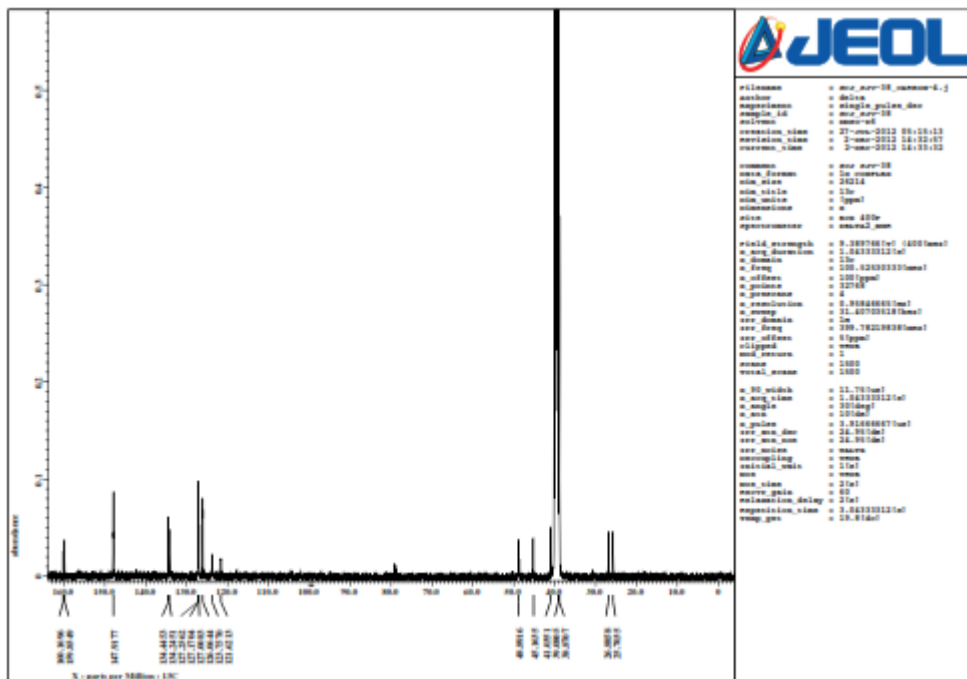

4-(4-(4-(Isoindolin-1,3-dion-2-ylmethyl)-1H-1,2,3-triazol-1-yl)butyloxy)quinazoline (1h)

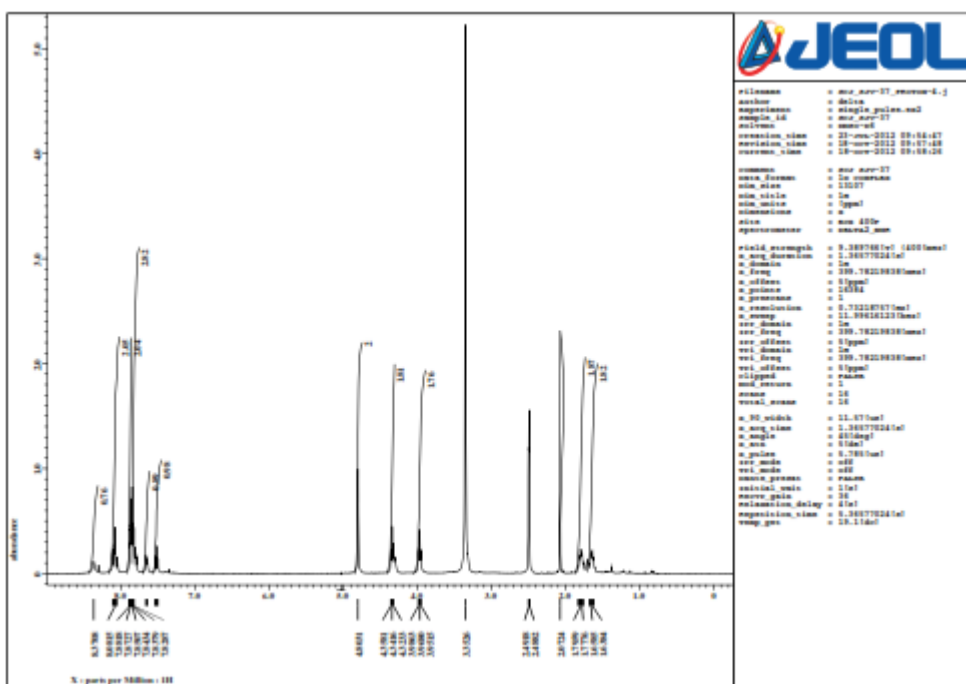



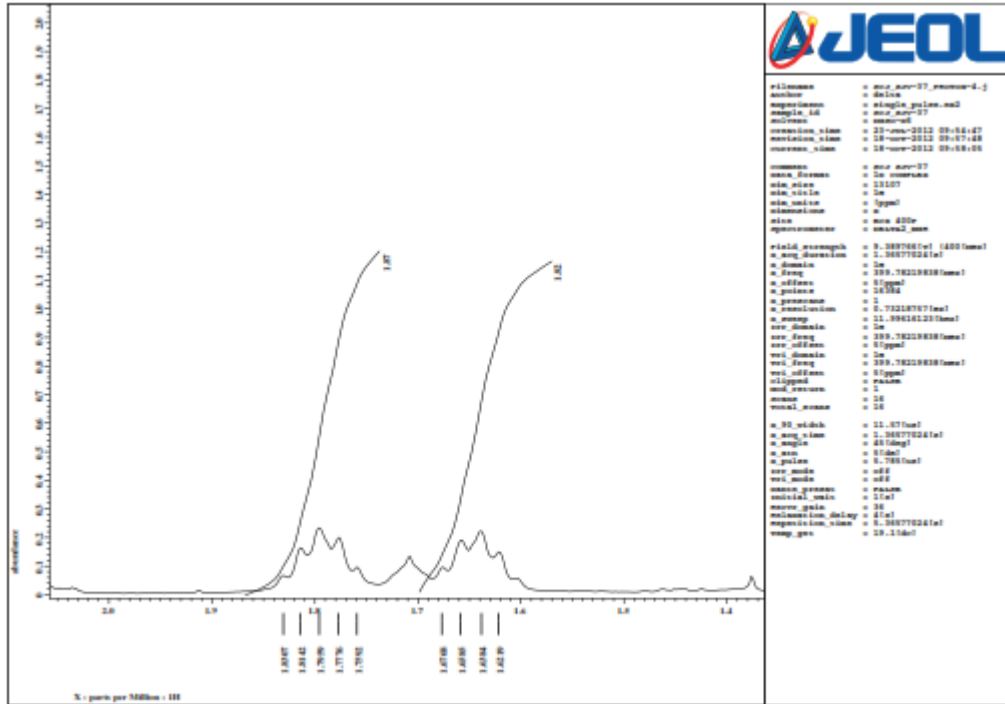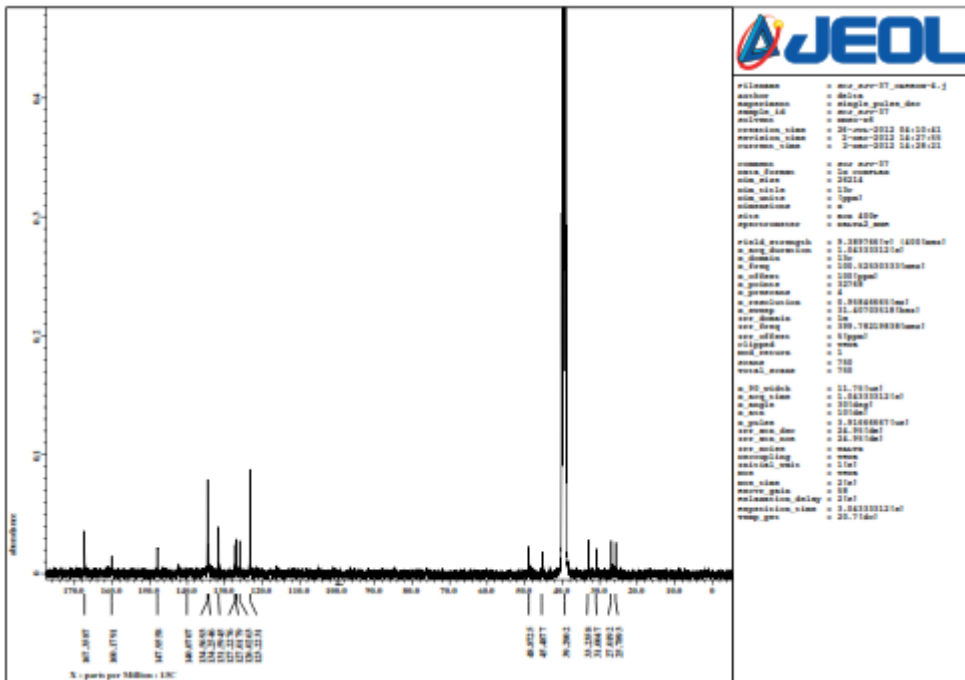

4-(4-(4-(Indolin-2,3-dion-1-ylmethyl)-1H-1,2,3-triazol-1-yl)butyloxy)quinazoline (1i)

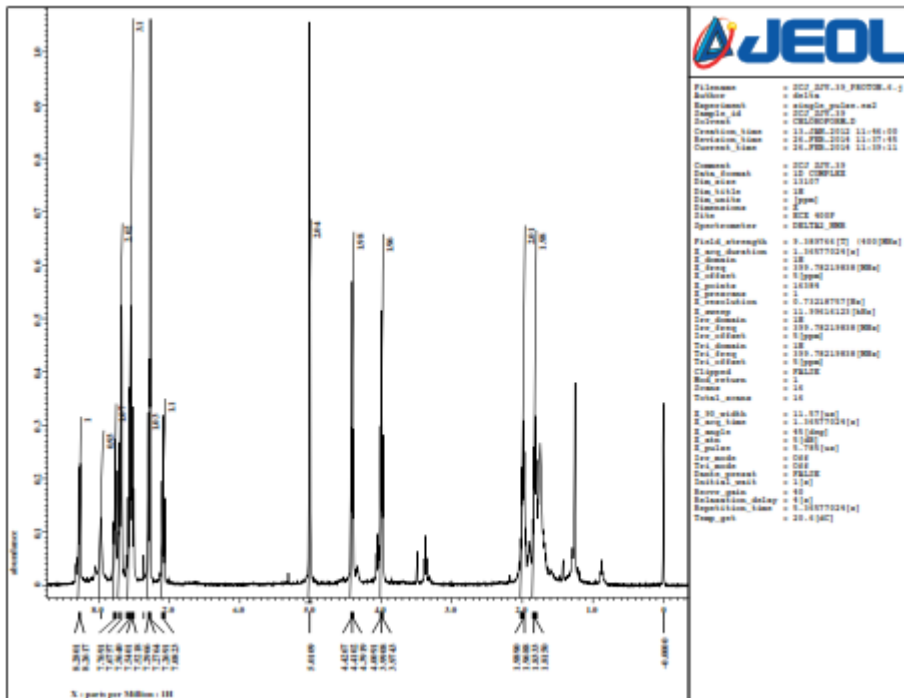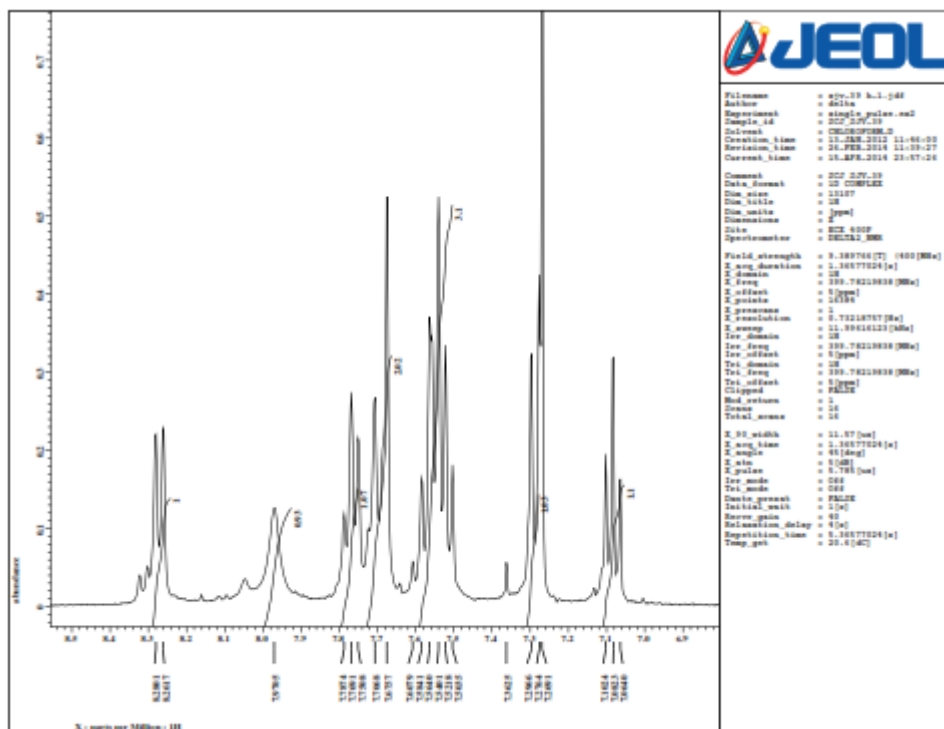

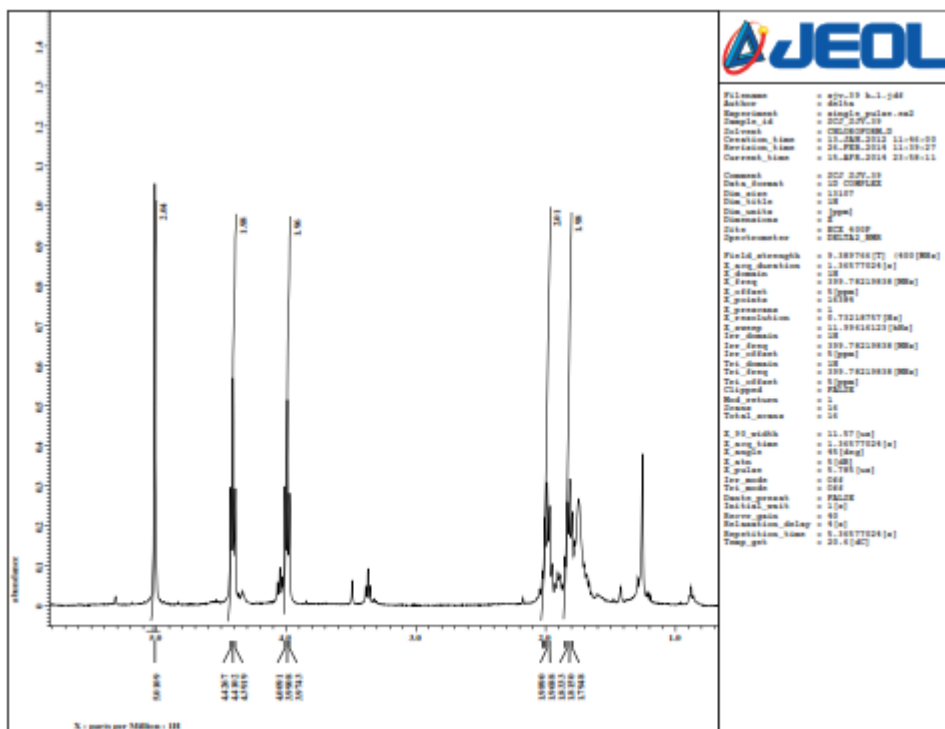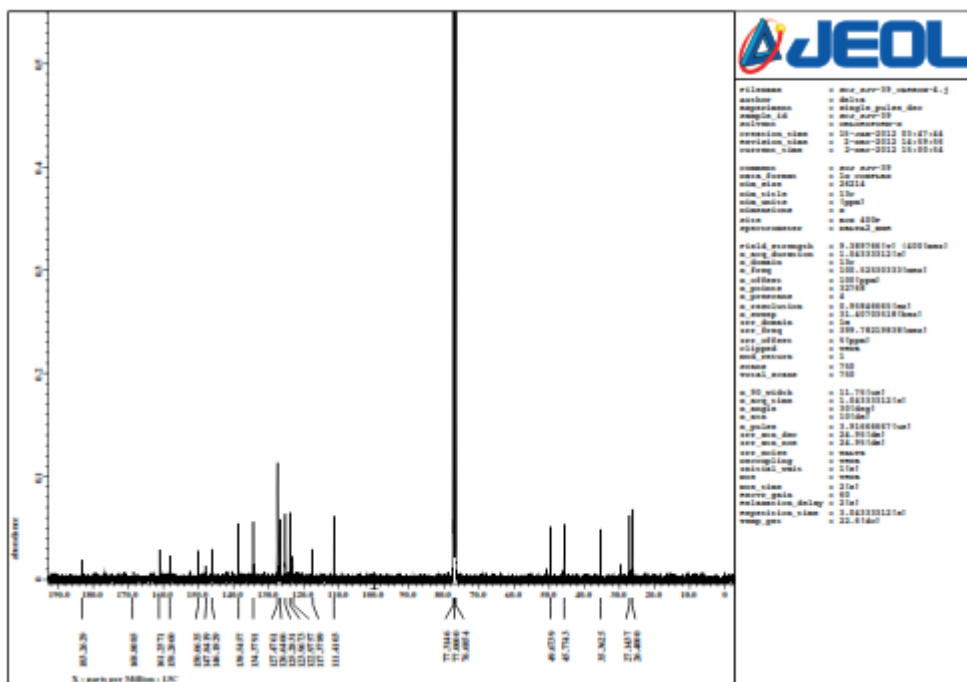

4-(6-(4-(1-Hydroxymethyl)-1*H*-1,2,3-triazol-1-yl)hexyloxy)quinazoline (2b)







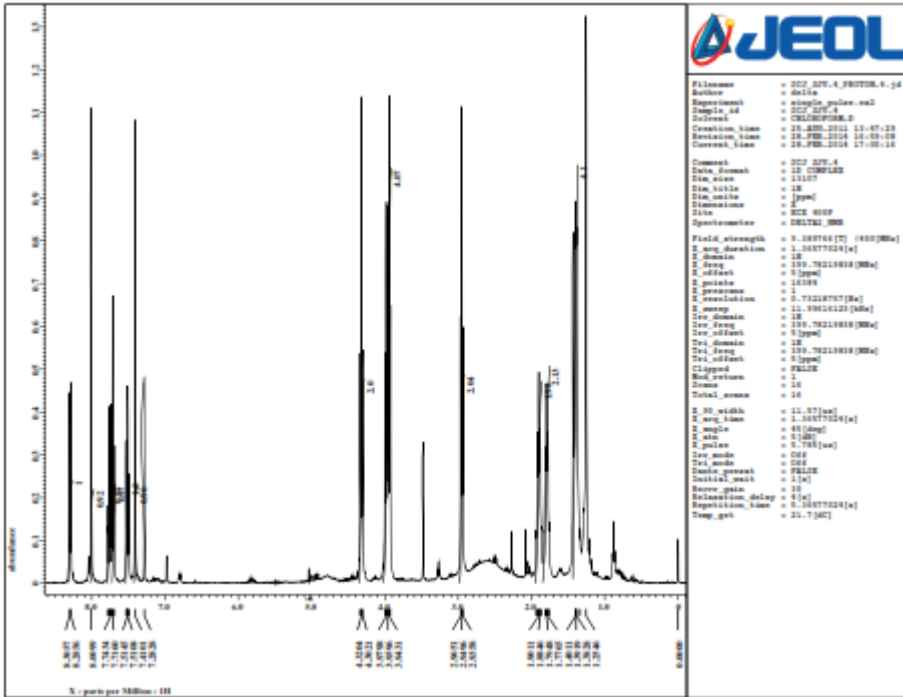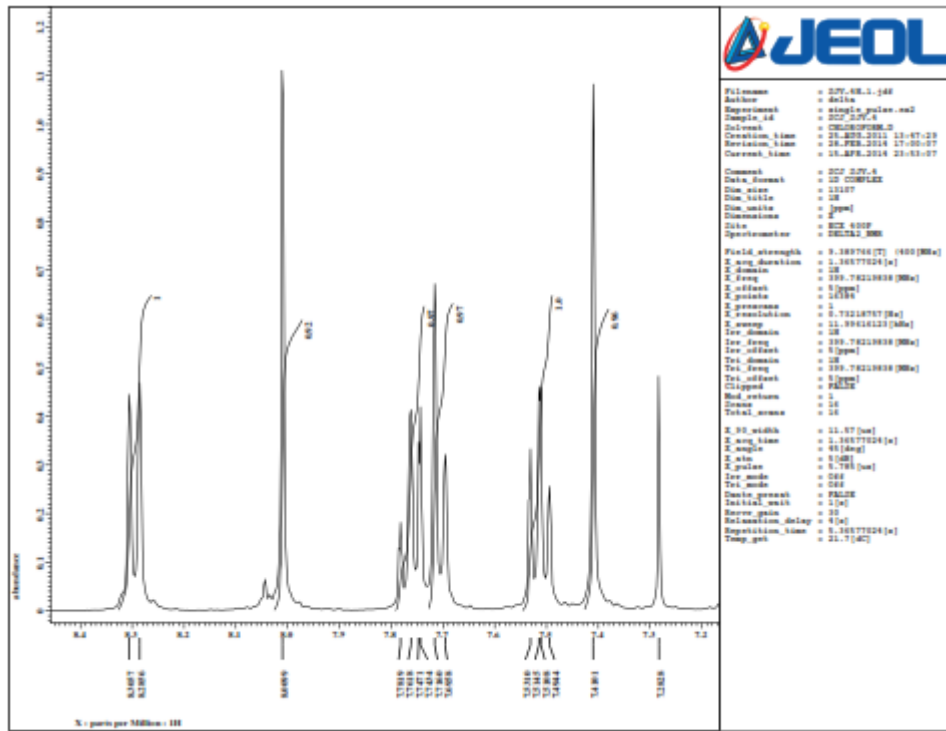

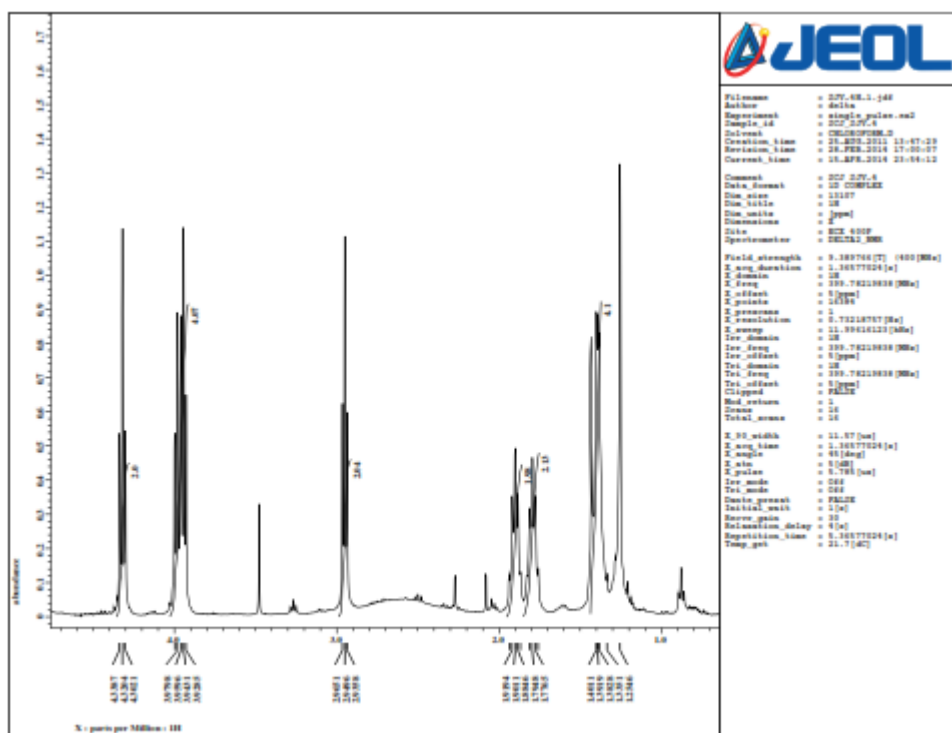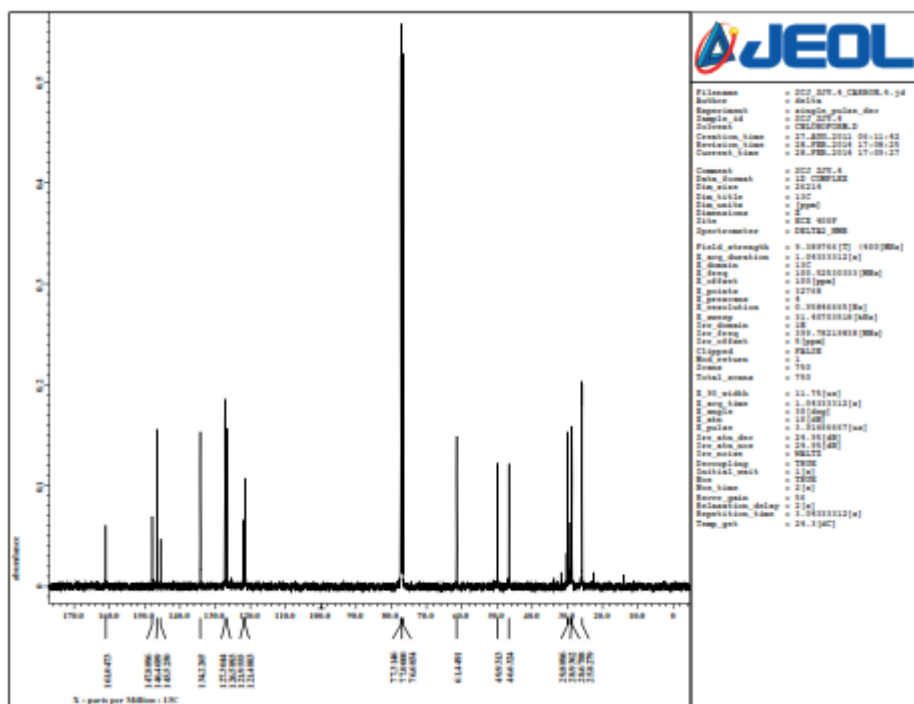

4-(6-(4-(1-Hydroxyprop-3-yl)-1*H*-1,2,3-triazol-1-yl)hexyloxy)quinazoline (**2d**)







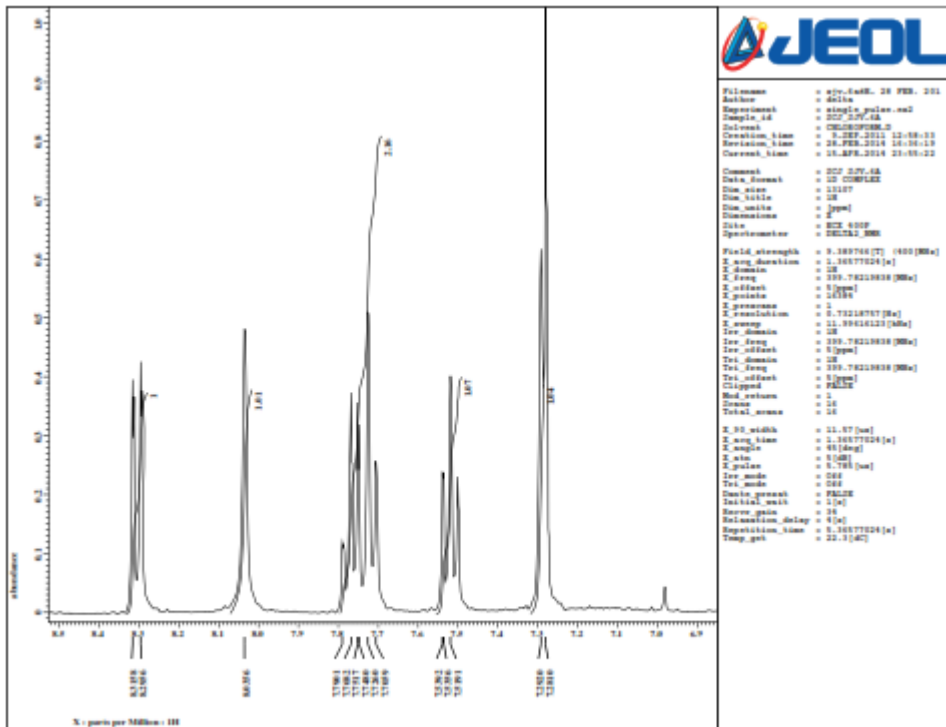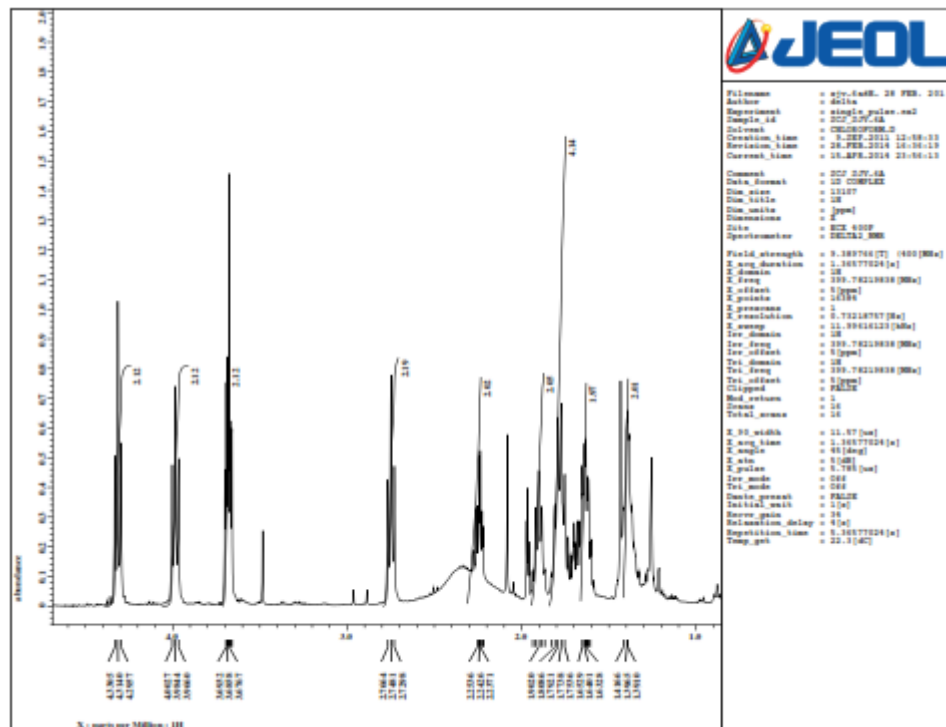







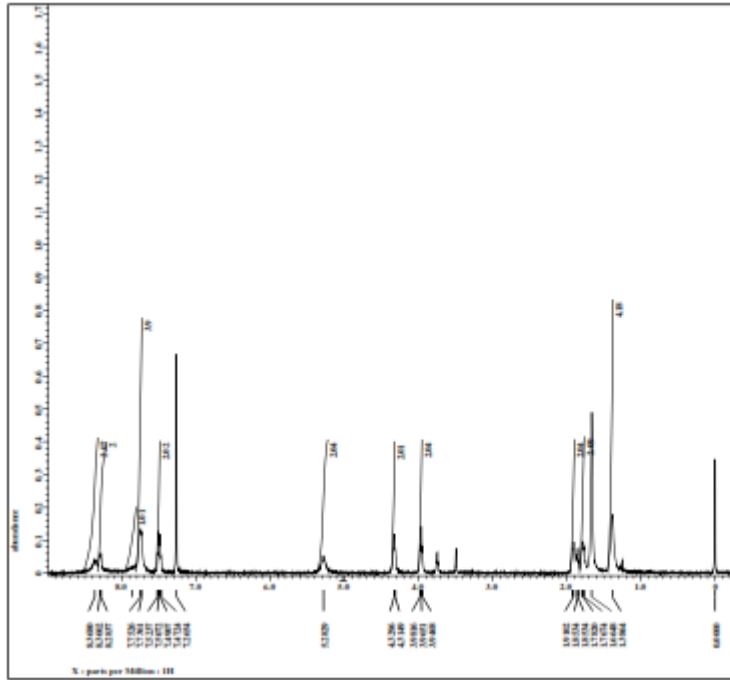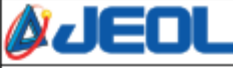

```

F1NAME = mv_xvr11_rever-d_1
ACQDIR = d:\Data
EXPERNAME = mslgla_glmw.mz2
PULPROG = mv_xvr11
PCVNAME = vmnucmrparm
PROBHDNAME = QNP5-5mm-CP
PROCNO = 28-mw-2011-11-30-01
PRUNFILE = 22-mw-2011-11-30-01
RESNAME = 11-mw-2011-11-30-01

===== mv_xvr11 =====
NAME_PREFIX = mv
NAME_SUFFIX = 5m
NAME_LENGTH = 13107
NAME_SHIFT = 0
NAME_WIDTH = 0
NAME_POSITION = 0
NAME_ROTATION = 0
NAME_ANGLE = 0
NAME_HEIGHT = 0
NAME_WIDTH_MM = 2.0
NAME_HEIGHT_MM = 2.0
NAME_ANGLE_MM = 0.0
NAME_ROTATION_MM = 0.0
NAME_HEIGHT_MM = 0.0

===== mv_xvr11 =====
NAME_SUFFIX = 5m
NAME_LENGTH = 13107
NAME_SHIFT = 0
NAME_WIDTH = 0
NAME_POSITION = 0
NAME_ROTATION = 0
NAME_ANGLE = 0
NAME_HEIGHT = 0
NAME_WIDTH_MM = 2.0
NAME_HEIGHT_MM = 2.0
NAME_ANGLE_MM = 0.0
NAME_ROTATION_MM = 0.0
NAME_HEIGHT_MM = 0.0
  
```

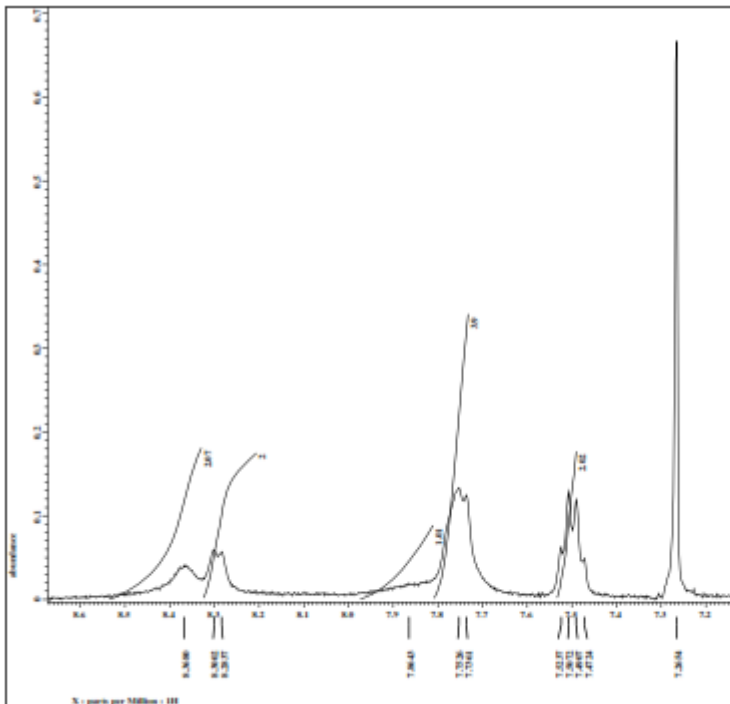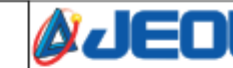

```

F1NAME = mv_xvr11_rever-d_1
ACQDIR = d:\Data
EXPERNAME = mslgla_glmw.mz2
PULPROG = mv_xvr11
PCVNAME = vmnucmrparm
PROBHDNAME = QNP5-5mm-CP
PROCNO = 28-mw-2011-11-30-01
PRUNFILE = 22-mw-2011-11-30-01
RESNAME = 11-mw-2011-11-30-01

===== mv_xvr11 =====
NAME_PREFIX = mv
NAME_SUFFIX = 5m
NAME_LENGTH = 13107
NAME_SHIFT = 0
NAME_WIDTH = 0
NAME_POSITION = 0
NAME_ROTATION = 0
NAME_ANGLE = 0
NAME_HEIGHT = 0
NAME_WIDTH_MM = 2.0
NAME_HEIGHT_MM = 2.0
NAME_ANGLE_MM = 0.0
NAME_ROTATION_MM = 0.0
NAME_HEIGHT_MM = 0.0

===== mv_xvr11 =====
NAME_SUFFIX = 5m
NAME_LENGTH = 13107
NAME_SHIFT = 0
NAME_WIDTH = 0
NAME_POSITION = 0
NAME_ROTATION = 0
NAME_ANGLE = 0
NAME_HEIGHT = 0
NAME_WIDTH_MM = 2.0
NAME_HEIGHT_MM = 2.0
NAME_ANGLE_MM = 0.0
NAME_ROTATION_MM = 0.0
NAME_HEIGHT_MM = 0.0
  
```

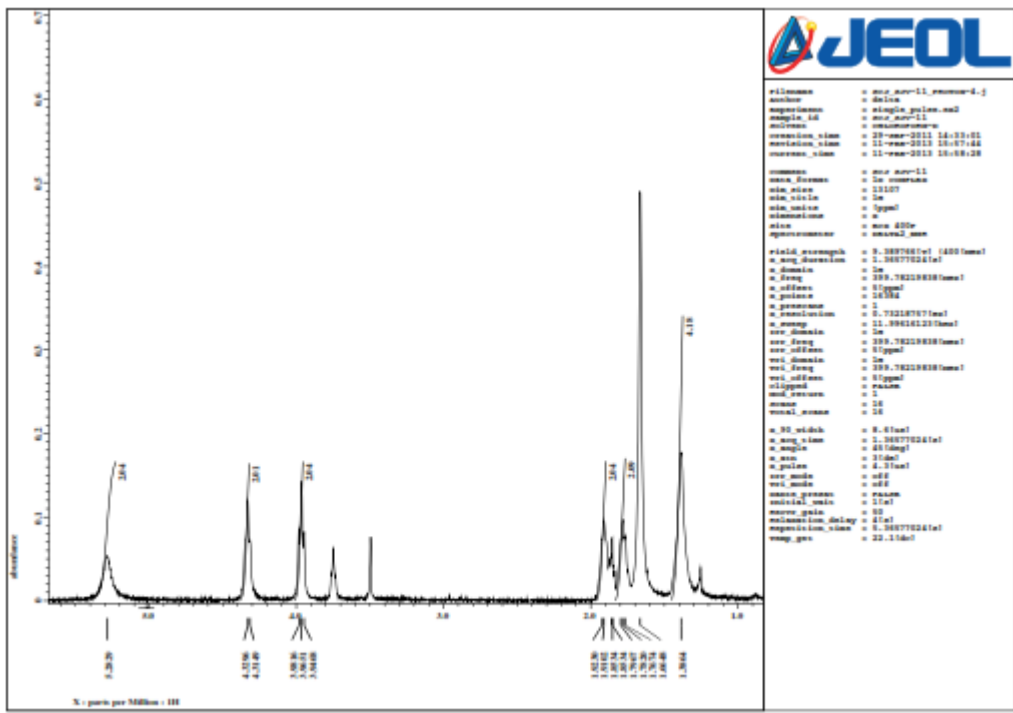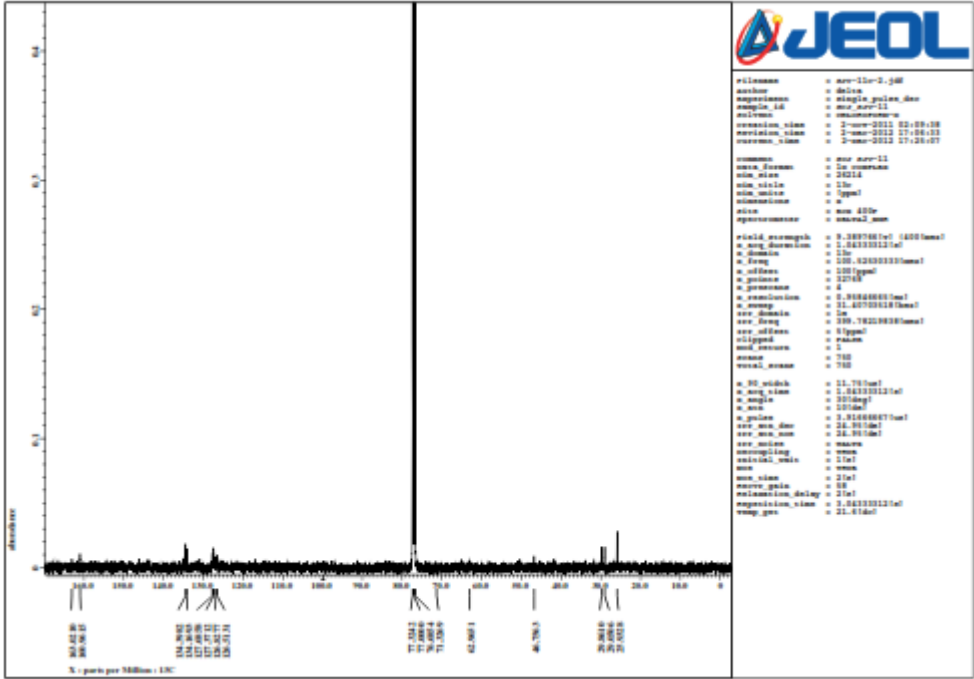

4-(6-(4-(Isoindolin-1,3-dion-2-ylmethyl)-1H-1,2,3-triazol-1-yl)hexyloxy) quinazoline (2h)
